1 Expression of *Ace2*, *Tmprss2*, and *Furin* in mouse ear tissue

2 Tsukasa Uranaka, M.D., Akinori Kashio M.D., Ph.D., Rumi Ueha, M.D., Ph.D.; Taku  
3 Sato, M.D., Han Bing, M.D., Gao Ying, M.D., Makoto Kinoshita M.D., Ph.D., Kenji  
4 Kondo, M.D., Ph.D.; Tatsuya Yamasoba M.D., Ph.D.

5  
6 Department of Otolaryngology and Head and Neck Surgery, Faculty of Medicine, the  
7 University of Tokyo, Tokyo, Japan

8  
9 **Key words:** SARS-CoV-2, COVID-19, ACE2, TMPRSS2, Furin, Temporal Bone

10 **Correspondence to:** Tatsuya Yamasoba, M.D., Ph.D.

11 Department of Otolaryngology and Head and Neck Surgery, Faculty of Medicine, the  
12 University of Tokyo, Tokyo, Japan, 113-8655

13 E-mail: tyamasoba-tyk@umin.ac.jp

14 Tel: +81-3-3815-5411, Fax: +81-3-3814-9486

15

#### 16 **Author contributions**

17 T.U developed the concept and performed the experiments, and wrote the draft of the  
18 manuscript. K. A., R.U., T.S., H.B., G.Y., and M.K. performed the experiments. K.K  
19 reviewed the manuscript. T.Y. developed the concept, designed the experiment, and  
20 wrote the draft of the manuscript. All authors contributed to interpretation of the data  
21 and writing of the manuscript.

22

#### 23 **Funding**

24 This work was supported by JSPS KAKENHI Grant-in-Aid for Scientific Research (A)  
25 [grant number 20H00546].

26

#### 27 **Conflict of Interest Statement**

28 We declare no competing interests.

29 **Abstract**

30 Objectives: Intracellular entry of the severe acute respiratory syndrome coronavirus 2  
31 (SARS-CoV-2) depends on the interaction between its spike protein to a cellular  
32 receptor named angiotensin-converting enzyme 2 (ACE2) and depends on  
33 Furin-mediated spike 23 protein cleavage and spike protein priming by host cell  
34 proteases including 24 transmembrane protease serine 2 (TMPRSS2). *Tmprss1*,  
35 *Tmprss3*, and *Tmprss5* are expressed in the spiral ganglion neurons and the organ of  
36 Corti in the inner ear; however, *Ace2*, *Tmprss2*, and *Furin* expression profiles in the  
37 middle ear remain unclear. Therefore, this study aimed to analyze *Ace2*, *Tmprss2*, and  
38 *Furin* expression in the middle and inner ear of mice.

39 Study Design: Animal research.

40 Setting: Department of Otolaryngology and Head and Neck Surgery, University of  
41 Tokyo.

42 Methods: We performed immunohistochemical analysis to examine the distribution of  
43 *Ace2*, *Tmprss2*, and *Furin* in the eustachian tube, middle ear space, and cochlea of mice.

44 Results: *Ace2* was expressed in the cytoplasm in the middle ear epithelium, eustachian

45 tube epithelium, stria vascularis, and spiral ganglion. Tmprss2 and Furin were widely  
46 expressed in the middle ear spaces and the cochlea.

47 Conclusion: Co-expression of Ace2, Tmprss2, and Furin in the middle ear indicates that  
48 the middle ear is susceptible to SARS-CoV-2 infections, thus warranting the use of  
49 personal protective equipment during mastoidectomy for coronavirus disease  
50 (COVID-19) patients.

51 Key words: SARS-CoV-2, COVID-19, ACE2, TMPRSS2, Furin, Temporal Bone

52

53

## 54 **Introduction**

55 The recent coronavirus disease (COVID-19) pandemic caused by severe acute  
56 respiratory syndrome coronavirus 2 (SARS-CoV-2) poses a serious health concerns.  
57 SARS-CoV-2 generally infects the upper respiratory tract and then spreads to various  
58 organs. The clinical symptoms of COVID-19 patients include fever, cough, sore throat,  
59 fatigue, and loss or decline of smell (anosmia or hyposmia).<sup>1-4</sup> The Eustachian tube is  
60 the conduit between the middle ear space and upper respiratory tract through which,

61 SARS-CoV-2 can spread into the middle ear spaces. Moreover, other human  
62 coronaviruses have been identified in middle ear fluid in cases of acute otitis media or  
63 otitis media with effusion.<sup>5-7</sup> Two studies have reported the occurrence of acute otitis  
64 media<sup>8</sup> and sensorineural hearing loss<sup>9</sup> among COVID-19 patients. Another study  
65 carried out pure tone audiometry and transitory evoked otoacoustic emission (TEOAE)  
66 analysis for 20 asymptomatic patients aged 20–50 years positive for COVID-19 on  
67 reverse transcription-PCR (RT-PCR) testing and reported that high-frequency pure-tone  
68 thresholds and TEOAE amplitudes were significantly worse among the COVID-19  
69 patients than among 20 healthy controls.<sup>10</sup>

70 Intracellular entry of SARS-CoV-2 depends on the interaction between viral spike  
71 proteins and a cellular receptor, angiotensin-converting enzyme 2 (Ace2)<sup>11-13</sup>,  
72 Furin-mediated Spike cleavage<sup>13-15</sup>, and Spike protein priming by host cell proteases  
73 including transmembrane protease serine 2 (Tmprss2).<sup>13,16</sup> Thus, Ace2, Tmprss2, and  
74 Furin upregulation enhances intracellular SARS-CoV-2 entry, thus resulting in clinical  
75 symptoms. Previous studies have reported 8 *Tmprss* genes including *Tmprss2* in the  
76 inner ear through RT-PCR analysis, although immunohistochemical analysis revealed

77 the expression of only *Tmprss1/3/5* in the inner ear, indicating that *Tmprss1/3/5* are  
78 expressed in the spiral ganglion neurons and *Tmprss3* is also expressed in the organ of  
79 Corti.<sup>17</sup> To our knowledge, *Ace2*, *Tmprss2*, and *Furin* expression in the middle ear  
80 spaces and *Ace2* and *Furin* expression in the inner ear have not been reported.

81 This study aimed to investigate the mechanism underlying middle ear infection and  
82 sensorineural hearing loss in COVID-19, by assessing *Ace2*, *Tmprss2*, and *Furin*  
83 expression in the middle and inner ear tissues of mice.

84

## 85 **Materials and Methods**

86

### 87 *Experimental samples*

88 Tissue samples were obtained from the mice used in our previous studies because  
89 the purchase of new animals has been prohibited in our facility owing to the COVID-19  
90 pandemic. Tissue samples were obtained from normal 11-week-old male ICR mice, and  
91 paraffin-embedded tissue samples including the middle ear spaces, Eustachian tube area,  
92 and cochlea were used (Figure 1, 2). Normal tissue morphology in these regions was

93 confirmed through hematoxylin and eosin staining by a qualified pathologist and by  
94 otolaryngologists. All experiments were conducted in accordance with institutional  
95 guidelines and with the approval of the Animal Care and Use Committee of the  
96 University of Tokyo (No. P18-015)

97

#### 98 *Histological analyses*

99 Immunohistochemical staining was performed for Ace2 and Tmprss2.  
100 Four-micrometer-thick serial paraffin-embedded sections were deparaffinized in xylene  
101 and dehydrated in ethanol and then treated with 3% H<sub>2</sub>O<sub>2</sub> to block endogenous  
102 peroxidase activity and incubated with Blocking One (Nacalai Tesque, 34 Kyoto, Japan)  
103 to block non-specific immunoglobulin binding prior to immunostaining. After antigen  
104 activation, the tissue sections were probed with primary anti-Ace2 (1:300 dilution;  
105 rabbit monoclonal, Abcam, ab108252; Cambridge, UK), anti-Tmprss2 (1:1000 dilution;  
106 rabbit monoclonal, Abcam, ab92323; Cambridge, UK), and anti-Furin (1:100 dilution;  
107 rabbit monoclonal, 1 Abcam, ab183495; Cambridge, UK) antibodies, followed by  
108 probing with appropriate peroxidase-conjugated secondary antibodies and a

109 diaminobenzidine substrate. Images of all sections were captured using a digital  
110 microscope camera (Keyence BZ-X700) with 4×, 10×, and 40× objective lenses.

111

## 112 **Results**

113 Ace2, Tmprss2, and Furin were detected in the mucosal epithelium of the  
114 Eustachian tube and middle ear spaces and in the cochlea, although their expression  
115 pattern varied among tissues. Furthermore, Ace2, Tmprss2, and Furin were  
116 co-expressed in the mucosal epithelium of the Eustachian tube and the middle ear  
117 spaces, the stria vascularis, and spiral ganglion cells.

118 Tmprss2 and Furin were expressed in the mucosal epithelial cells in the  
119 middle ear spaces; however, Ace2 was only slightly expressed in the cytoplasm of the  
120 epithelial cells (Fig.1A). Furthermore, Ace2 and Tmprss2 were expressed in the nuclei  
121 of epithelial cells. Ace2, Tmprss2, and Furin expression profiles in the Eustachian tube  
122 were almost identical to those in the middle ear spaces (Fig.1B).

123 In the cochlea, Ace2 was expressed in the nuclei of the hair cells and supporting  
124 cells in the organ of Corti, marginal, intermediate, and basal cells in the stria vascularis,

125 fibrocytes of the spiral ligament, and spiral ganglion cells. Furthermore, Ace2 was  
126 slightly expressed in the cytoplasm of stria cells and spiral ganglion cells. Tmprss2  
127 was diffusely strongly expressed in the nuclei and cytoplasm in the organ of Corti,  
128 stria vascularis, spiral ligament, and spiral ganglion cells, being greater in the nucleus  
129 than in the cytoplasm. Furin was diffusely expressed in the cytoplasm, but not in the  
130 nucleus, in the organ of Corti, stria vascularis, spiral ligament, and spiral ganglion cells  
131 (Fig.2).

132

### 133 **Discussion**

134

135 This immunohistochemical study shows that Ace2, Tmprss2, and Furin are  
136 co-expressed in the mucosal epithelium of the Eustachian tube and middle ear spaces  
137 and the organ of Corti, lateral wall, and spiral ganglion cells in the cochlea. In both  
138 middle ear tissues and the cochlea, Ace2 is primarily expressed in the nucleus, while  
139 Tmprss2 is expressed in the nucleus and cytoplasm, and Furin was expressed primarily  
140 in the cytoplasm. These results suggest that middle ear spaces are highly susceptible to



141 SARS-CoV-2 infections spreading from the upper respiratory tract through the  
142 Eustachian tube, indicating the possibility of severe sensorineural hearing loss upon  
143 intracellular entry of SARS-CoV-2 in the cochlea.

144 Herein, we used ICR mice to determine the distribution of Ace2, Tmprss2, and  
145 Furin in the ear tissues. We could not obtain human ear tissue samples for  
146 immunostaining; hence, the expression patterns of these proteins in human ear tissues  
147 might differ from those of the present mouse ear tissues. However, we previously  
148 compared the Ace2, Tmprss2, and Furin expression patterns between human and mouse  
149 nasal tissues and found that their expression patterns were identical.<sup>18</sup>

150 Mastoidectomy is required during major ear surgeries including cochlear  
151 implantation and middle ear surgery for extensive cholesteatoma. Mastoidectomy with a  
152 high-speed drill generates massive aerosols.<sup>19</sup> Previously, cadaveric simulation of  
153 otological procedures during mastoidectomy revealed gross contamination 3 to 6 feet  
154 away in all cardinal directions and more significantly on the left side, corresponding to  
155 the direction of drill rotation.<sup>20</sup> SARS-CoV-2 would substantially infect the middle ear  
156 spaces because of the co-expression of Aces, Tmprss2, and Furin. Therefore, high levels

157 of personal protective equipment are strongly recommended during mastoidectomy for  
158 COVID-19 patients or all mastoidectomies during the COVID-19 pandemic.

159 The cochlea is isolated and thus is generally resistant to the infection. A recent  
160 systemic review on the audio-vestibular symptoms of coronavirus infections found no  
161 records of audio-vestibular symptoms reported during previous coronaviral diseases  
162 including SARS and Middle East respiratory syndrome.<sup>21</sup> However, Ace2, Tmprss2, and  
163 Furin were co-expressed in the organ of Corti, lateral wall, and spiral ganglion cells in the  
164 cochlea. Thus, similar to other viral infections including mumps, when SARS-CoV-2  
165 enters the cochlea, it can cause severe labyrinthitis, resulting in marked hearing loss.

166

## 167 **Conclusions**

168 Ace2, Tmprss2, and Furin are co-expressed in the mucosal epithelium of the  
169 Eustachian tube and middle ear spaces and the organ of Corti, lateral wall, and spiral  
170 ganglion cells in the cochlea in mice. ACE2 is primarily expressed in the nucleus,  
171 Tmprss2 is expressed in the nucleus and cytoplasm, and Furin is primarily expressed in  
172 the cytoplasm. These results indicate that middle ear spaces are highly susceptible to the

173 SARS-CoV-2 infection, thus warranting the extensive use of personal protective  
174 equipment during mastoidectomy for COVID-19 patients.

175

## 176 **Acknowledgments**

177 We would like to thank Editage ([www.editage.com](http://www.editage.com)) for English language editing.

178

## 179 **References**

180 1. Huang C, Wang Y, Li X, et al. Clinical features of patients infected with 2019 novel  
181 coronavirus in Wuhan, China. *Lancet* 2020;395:497-506.

182 2. Huang X, Wei F, Hu L, Wen L, Chen K. Epidemiology and Clinical Characteristics of  
183 COVID-19. *Arch Iran Med* 2020;23:268-271

184 3. Lechien JR, Chiesa-Estomba CM, De Siaty DR, et al. Olfactory and gustatory  
185 dysfunctions as a clinical presentation of mild-to-moderate forms of the coronavirus  
186 disease (COVID-19): a multicenter European study. *Eur Arch Otorhinolaryngol*  
187 2020;1-11.

188 4. Vaira LA, Deiana G, Fois AG, et al. Objective evaluation of anosmia and ageusia in

- 189 COVID-19 patients: Single-center experience on 72 cases [published online ahead of  
190 print, 2020 Apr 27]. *Head Neck* 2020;10.1002/hed.26204.
- 191 5. Pitkäranta A, Virolainen A, Jero J, et al. Detection of rhinovirus, respiratory syncytial  
192 virus, and coronavirus infections in acute otitis media by reverse transcriptase  
193 polymerase chain reaction. *Pediatrics* 1998;102:291-295.
- 194 6. Bulut Y, Güven M, Otlu B, et al. Acute otitis media and respiratory viruses. *Eur J*  
195 *Pediatr* 2007;166:223-228.
- 196 7. Pitkäranta A, Jero J, Arruda E, et al. Polymerase chain reaction-based detection of  
197 rhinovirus, respiratory syncytial virus, and coronavirus in otitis media with effusion. *J*  
198 *Pediatr* 1998;133:390-394.
- 199 8. Fidan V. New type of corona virus induced acute otitis media in adult [published  
200 online ahead of print, 2020 Apr 16]. *Am J Otolaryngol* 2020;102487.
- 201 9. Sriwijitalai W, Wiwanitkit V. Hearing loss and COVID-19: A note [published online  
202 ahead of print, 2020 Apr 2]. *Am J Otolaryngol* 2020;102473.
- 203 10. Mustafa MWM. Audiological profile of asymptomatic Covid-19 PCR-positive cases  
204 [published online ahead of print, 2020 Apr 10]. *Am J Otolaryngol* 2020;102483.

- 205 11. Li W, Moore MJ, Vasilieva N, et al. Angiotensin-converting enzyme 2 is a  
206 functional receptor for the SARS coronavirus. *Nature* 2003;426:450-454.
- 207 12. Wu F, Zhao S, Yu B, et al. A new coronavirus associated with human respiratory  
208 disease in China [published correction appears in *Nature*. 2020 Apr;580(7803):E7].  
209 *Nature* 2020;579:265-269.
- 210 13. Lukassen S, Chua RL, Trefzer T, et al. SARS-CoV-2 receptor ACE2 and TMPRSS2  
211 are primarily expressed in bronchial transient secretory cells. *EMBO J*  
212 2020;39:e105114.
- 213 14. Walls AC, Park YJ, Tortorici MA, et al. Structure, Function, and Antigenicity of the  
214 SARS-CoV-2 Spike Glycoprotein. *Cell* 2020;181:281-292.e6.
- 215 15. Coutard B, Valle C, de Lamballerie X, et al. The spike glycoprotein of the new  
216 coronavirus 2019-nCoV contains a furin-like cleavage site absent in CoV of the same  
217 clade. *Antiviral Res* 2020;176:104742.
- 218 16. Matsuyama S, Nao N, Shirato K, et al. Enhanced isolation of SARS-CoV-2 by  
219 TMPRSS2-expressing cells. *Proc Natl Acad Sci U S A* 2020;117:7001-7003.
- 220 17. Guipponi M, Toh MY, Tan J, et al. An integrated genetic and functional analysis of

221 the role of type II transmembrane serine proteases (TMPRSSs) in hearing loss. *Hum*  
222 *Mutat* 2008;29:130-141.

223 18. R. Ueha, K. Kondo, R. Kagoya et al. Background mechanisms of olfactory  
224 dysfunction in COVID-19: expression of ACE2, TMPRSS2, and Furin in the nose and  
225 olfactory bulb in human and mice. submitted  
226 <https://biorxiv.org/cgi/content/short/2020.05.15.097352v1>

227 19. Chen JX, Workman AD, Chari DA, et al. Demonstration and mitigation of aerosol  
228 and particle dispersion during mastoidectomy relevant to the COVID-19 era [published  
229 online ahead of print, 2020 May 8]. *Otol Neurotol*.  
230 2020;10.1097/MAO.0000000000002765.

231 20. Sharma D, Rubel KE, Ye MJ, et al. Cadaveric Simulation of Otologic Procedures:  
232 An Analysis of Droplet Splatter Patterns During the COVID-19 Pandemic [published  
233 online ahead of print, 2020 May 19]. *Otolaryngol Head Neck Surg*  
234 2020;194599820930245.

235 21. Almfurrij I, Uus K, Munro KJ. et al. Does coronavirus affect the audio-vestibular  
236 system? A rapid systematic review. *Int J Audiol*. 2020;12:1-5



238 **Figure Legends**

239 Figure 1. Histological analysis of the middle ear spaces and the Eustachian tube  
240 expressing Ace2, Tmprss2, and Furin.

241 **A:** Hematoxylin-eosin staining of the middle ear mucosa (magnification, 40×).  
242 Immunohistochemical staining for Ace2 (cytoplasm), Tmprss2 (nucleus and cytoplasm),  
243 and Furin (cytoplasm) (400×). **B:** Parts of the Eustachian tube (40×) and Ace2, Tmprss2,  
244 and Furin expression in middle ear spaces (400×).

245

246 Figure 2: Cochlear Ace2, Tmprss2, and Furin expression.

247 **Top panel:** Parts of the organ of Corti (OC), stria vascularis (SV), and spiral ganglion  
248 (SPG) (magnification, 40×). **OC:** Ace2 expressed in the nucleus of the hair cells and OC  
249 supporting cells; Tmprss2, diffuse in OC cell nuclei and cytoplasm; Furin, diffuse in  
250 the OC cell cytoplasm. **SV:** Ace2, nucleus of marginal, intermediate, and basal cells in  
251 the stria vascularis; Tmprss2, nucleus and cytoplasm in the stria vascularis; Furin,  
252 cytoplasm in the stria vascularis. **SPG:** Ace2, nucleus of the spiral ganglion cells;  
253 Tmprss2, diffuse in the nucleus and cytoplasm in spiral ganglion cells; Furin, diffuse in



254 the cytoplasm in the spiral ganglion cells.

**A**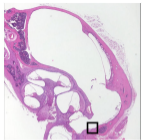**ACE2**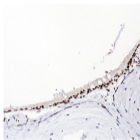**TMPRSS2**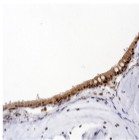**Furin**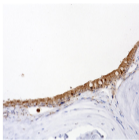**B**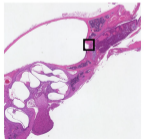**ACE2**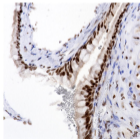**TMPRSS2**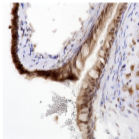**Furin**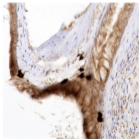

**ACE2**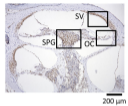**TMPRSS2**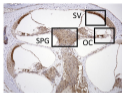**Furin**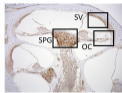200  $\mu\text{m}$ **OC**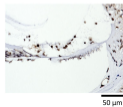50  $\mu\text{m}$ 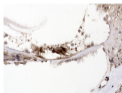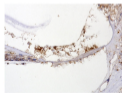**SV**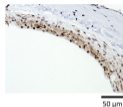50  $\mu\text{m}$ 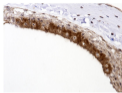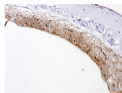**SPG**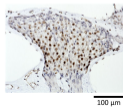100  $\mu\text{m}$ 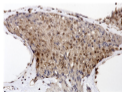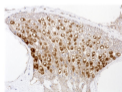

Source: http://biorxiv.org/content/10.1101/2020.06.23.164335v1.full.pdf
